# Supplementary material for: Prognostic significance of Spinster homolog gene family in acute myeloid leukemia
Source: PubMed Central journal article supplement (PMC7255376; doi:10.7150/jca.44766), 2020-05-18
Supplement: jcav11p4581s1.pdf [file jcav11p4581s1.pdf]

## SPNS2

Figure 1 Distribution of *SPNS2* expression level among 84 Chemotherapy-only patients.

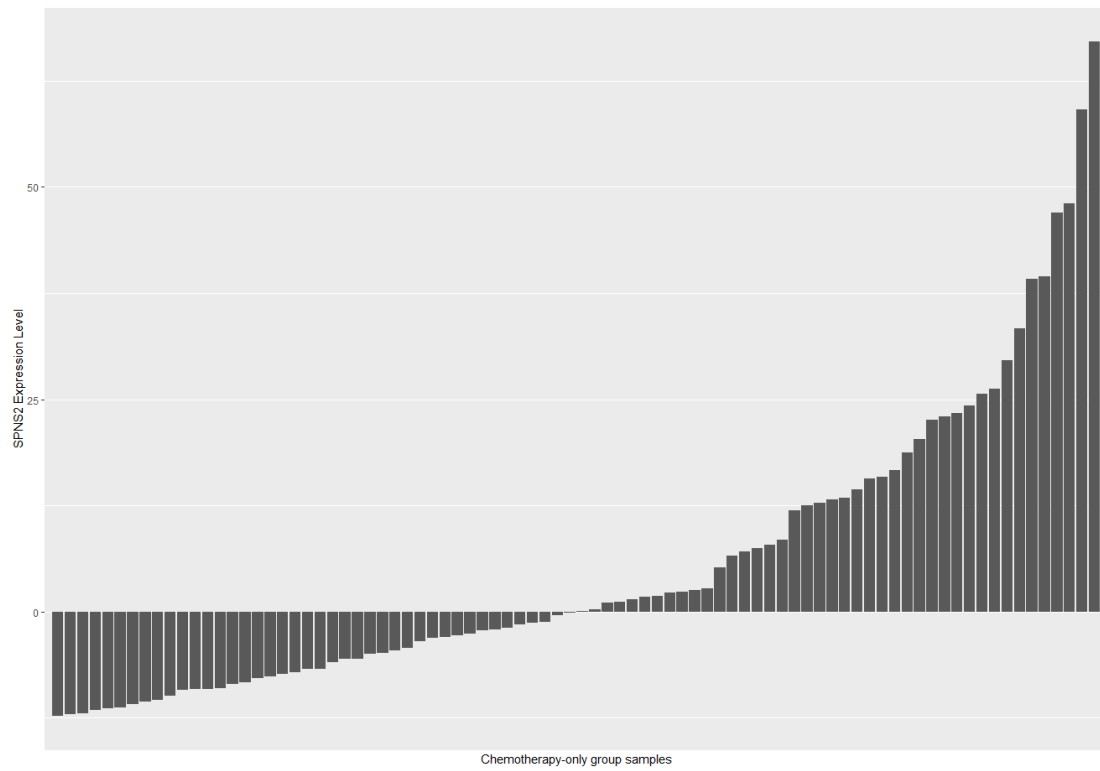

Table 1 Number of positive and negative co-expression genes with *SPNS2*

Positive: 3100    Negative: 1158

Figure 2 Heatmap of genes that enriched in Sphingolipid signaling pathway

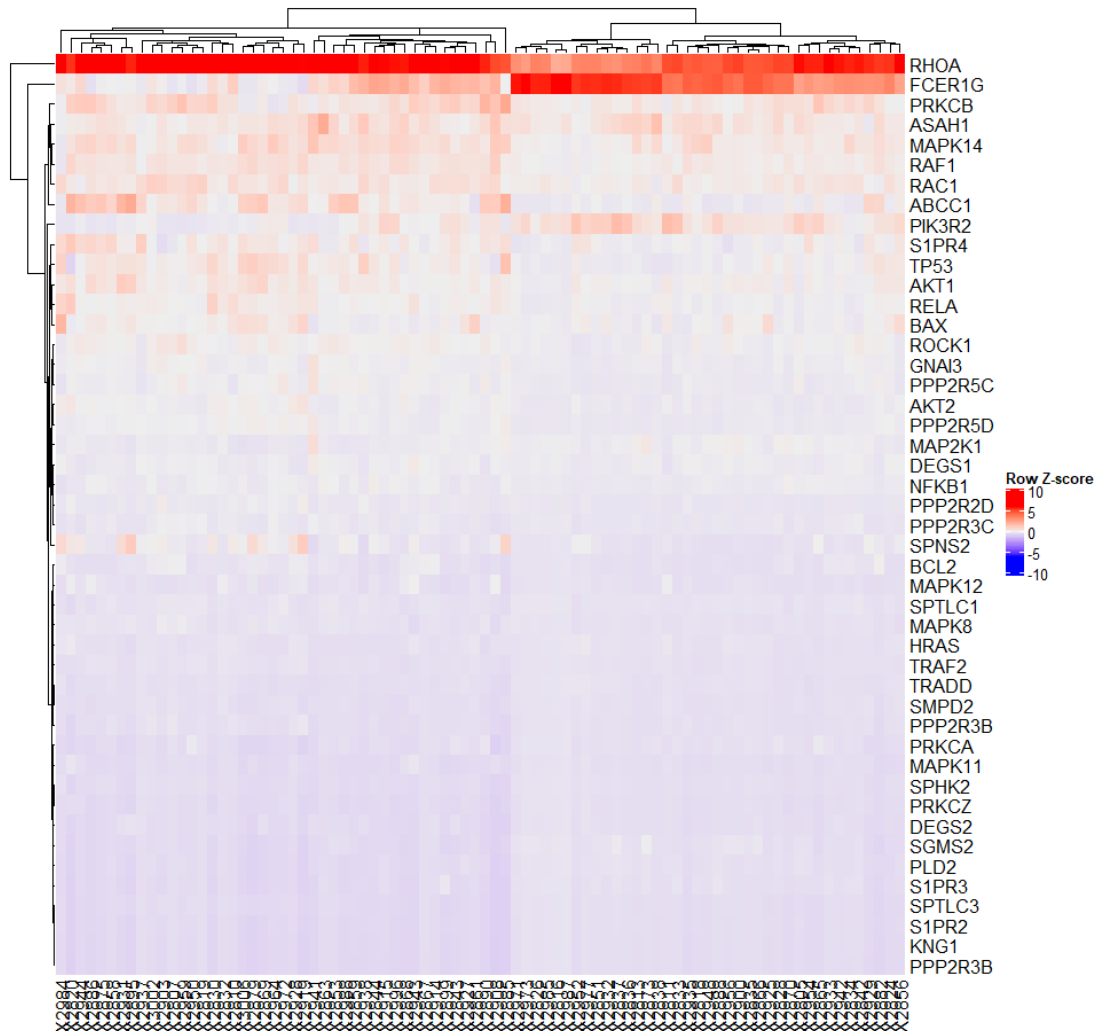

Table 2 Genes correlated with *SPNS2*

| Gene Name | cor      |
|-----------|----------|
| ABCC1     | 0.523683 |
| AKT1      | 0.30999  |
| AKT2      | 0.624472 |
| BAX       | 0.34092  |
| BCL2      | 0.398772 |

|         |          |
|---------|----------|
| DEGS2   | 0.41566  |
| HRAS    | 0.412205 |
| KNG1    | 0.401638 |
| MAPK11  | 0.516029 |
| MAPK12  | 0.344134 |
| MAPK8   | 0.396831 |
| PPP2R2D | 0.384262 |
| PPP2R3B | 0.483439 |
| PRKCZ   | 0.413783 |
| RELA    | 0.514216 |
| S1PR4   | 0.358807 |
| SMPD2   | 0.405184 |
| SPHK2   | 0.415152 |
| SPTLC3  | 0.404723 |
| TP53    | 0.43819  |
| TRADD   | 0.33011  |
| TRAF2   | 0.376445 |
| ASAHI   | -0.47634 |
| DEGS1   | -0.38313 |
| FCER1G  | -0.38244 |
| GNAI3   | -0.30349 |
| MAP2K1  | -0.4801  |

|         |          |
|---------|----------|
| MAPK14  | -0.44621 |
| NFKB1   | -0.36881 |
| PLD2    | -0.43392 |
| PPP2R3C | -0.48975 |
| PPP2R5C | -0.31493 |
| PRKCA   | -0.31925 |
| RAC1    | -0.32275 |
| RAF1    | -0.41965 |
| RHOA    | -0.38025 |
| ROCK1   | -0.38345 |
| S1PR3   | -0.40399 |
| SGMS2   | -0.35404 |
| SPTLC1  | -0.45194 |

## SPNS3

Figure 3 Distribution of *SPNS3* expression level among 84 Chemotherapy-only patients.

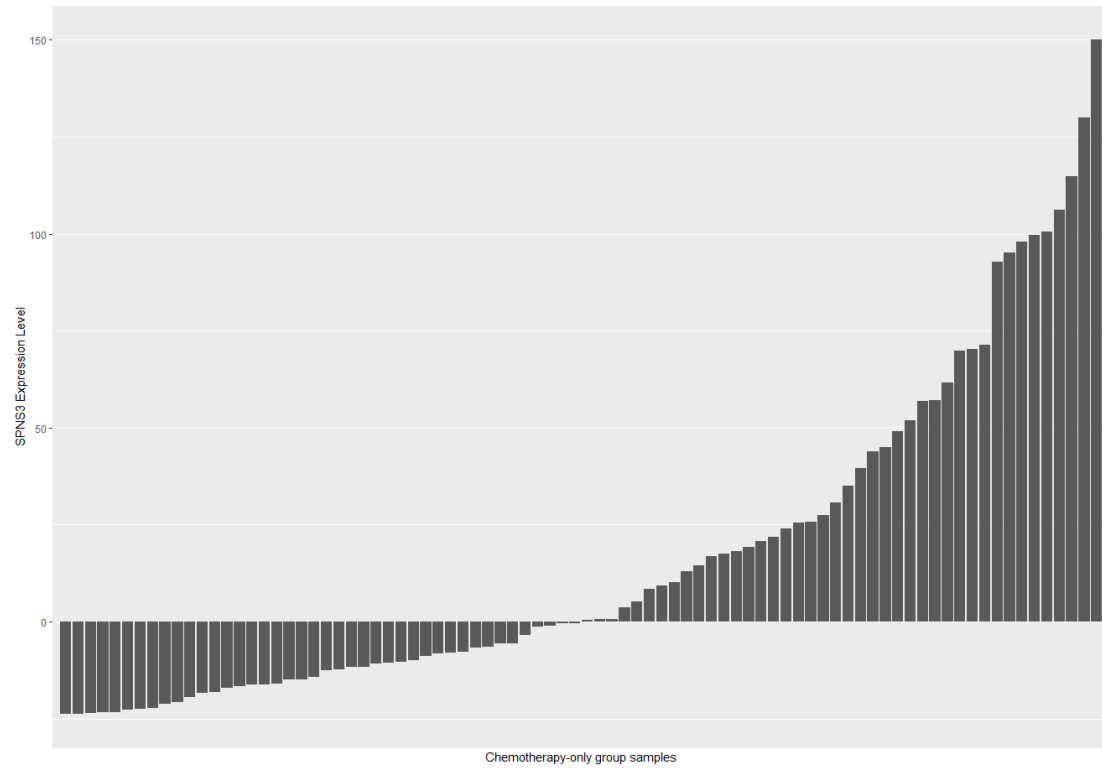

Table 3 Number of positive and negative co-expression genes with *SPNS3*

Positive:1491    Negtive440

Figure 4 Heatmap of genes that enriched in Sphingolipid signaling pathway

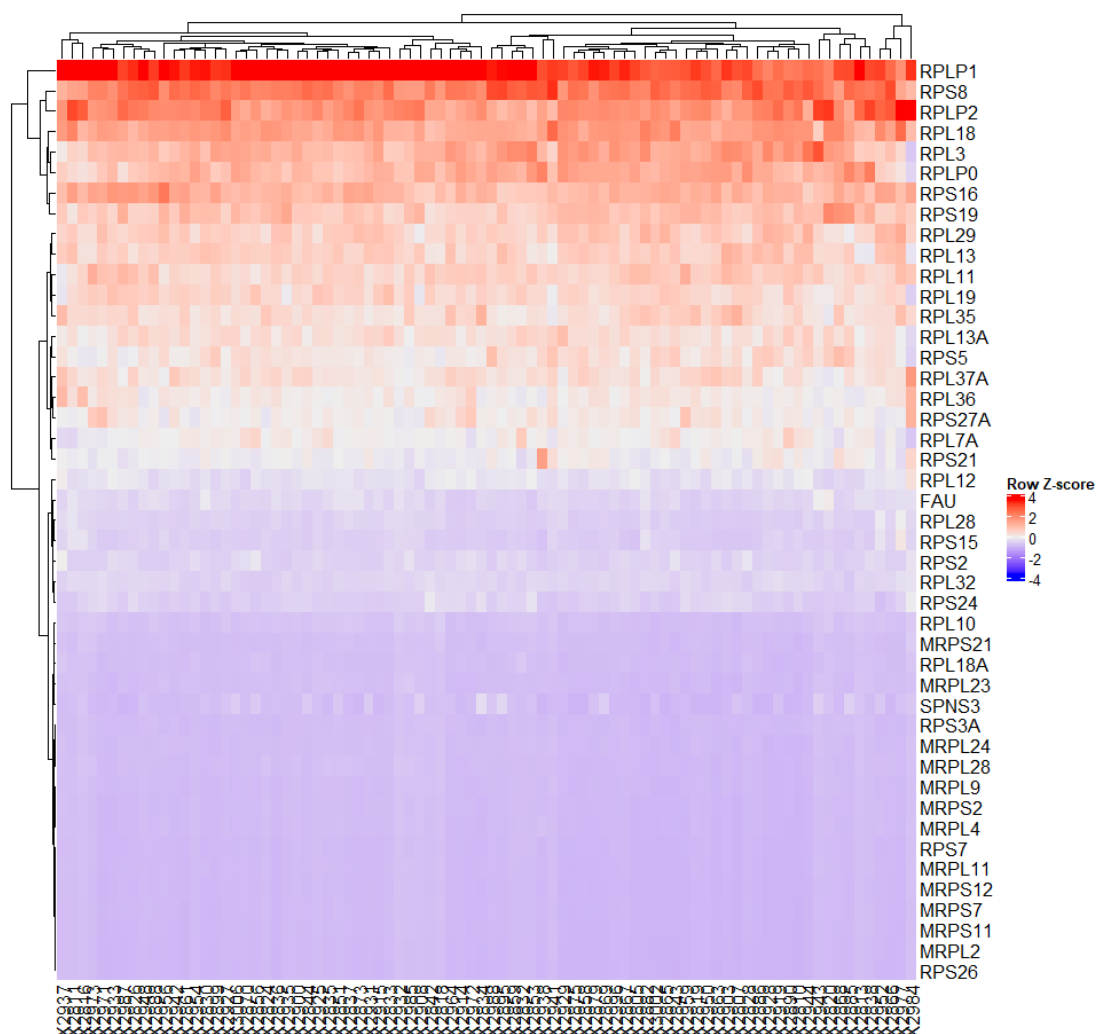

Table 4 Sphingolipid signaling pathway Genes correlated with SPNS2

| genenames | cor      |
|-----------|----------|
| FAU       | 0.36401  |
| MRPL11    | 0.447419 |
| MRPL23    | 0.329104 |
| MRPL24    | 0.301323 |
| MRPL2     | 0.410111 |
| MRPL4     | 0.348966 |
| MRPL9     | 0.34174  |
| MRPS12    | 0.358811 |
| MRPS2     | 0.356368 |
| MRPS7     | 0.36521  |

|        |          |
|--------|----------|
| RPL10  | 0.365496 |
| RPL11  | 0.340267 |
| RPL12  | 0.328034 |
| RPL13A | 0.313535 |
| RPL13  | 0.393324 |
| RPL18A | 0.334838 |
| RPL18  | 0.35281  |
| RPL28  | 0.332479 |
| RPL29  | 0.354087 |
| RPL32  | 0.339217 |
| RPL35  | 0.303092 |
| RPL7A  | 0.311082 |
| RPLP0  | 0.314914 |
| RPLP1  | 0.356117 |
| RPLP2  | 0.356466 |
| RPS15  | 0.334712 |
| RPS19  | 0.394777 |
| RPS2   | 0.351704 |
| RPS5   | 0.33231  |
| RPS7   | 0.312979 |
| RPS8   | 0.341826 |
